1 **Insecticide resistance status of indoor and outdoor resting malaria vectors in a highland and**  
2 **lowland site in Western Kenya**

3 Kevin O. Owuor<sup>1, 2</sup>, Maxwell G. Machani<sup>1</sup>, Wolfgang R. Mukabana<sup>2, 3</sup>, Stephen Munga<sup>1</sup>, Guiyun  
4 Yan<sup>4</sup>, Eric Ochomo<sup>1</sup> and Yaw A. Afrane<sup>5\*</sup>

5 <sup>1</sup> Centre for Global Health Research, Kenya Medical Research Institute, Kisumu, Kenya

6 <sup>2</sup> School of Biological Sciences, University of Nairobi, Kenya

7 <sup>3</sup> Science for Health Society, P.O. Box 44970-00100, Nairobi, Kenya

8 <sup>4</sup>Program in Public Health, College of Health Sciences, University of California, Irvine, CA 92697,  
9 USA

10 <sup>5</sup>Department of Medical Microbiology, University of Ghana Medical School, University of Ghana,  
11 Ghana.

12 Kevin O. Owuor<sup>1,2</sup>

13 Email: [owuorkevinomondi@gmail.com](mailto:owuorkevinomondi@gmail.com)

14 Maxwell G. Machani<sup>1</sup>

15 Email: [machani.maxwe2011@gmail.com](mailto:machani.maxwe2011@gmail.com)

16 Wolfgang R. Mukabana<sup>2, 3</sup>

17 Email: [richard.mukabana@gmail.com](mailto:richard.mukabana@gmail.com)

18 Stephen Munga<sup>1</sup>

19 Email: [munga\\_os@yahoo.com](mailto:munga_os@yahoo.com)

20 Guiyun Yan<sup>4</sup>

21 Email: [guiyuny@uci.edu](mailto:guiyuny@uci.edu)

22 Eric Ochomo<sup>1</sup>,

23 Email: [ericochomo@yahoo.com](mailto:ericochomo@yahoo.com)

24 Yaw A. Afrane<sup>5</sup>

25 Corresponding author

26 Email: [yaw\\_afrane@yahoo.com](mailto:yaw_afrane@yahoo.com)

27

28 **Abstract**

29 **Background:** Long Lasting Insecticidal Nets (LLINs) and indoor residual spraying (IRS)  
30 represent powerful tools for controlling malaria vectors in sub-Saharan Africa. The success of  
31 these interventions relies on their capability to inhibit indoor feeding and resting of malaria  
32 mosquitoes. This study sought to understand the interaction of insecticide resistance with indoor  
33 and outdoor resting behavioral responses of malaria vectors from Western Kenya.

34 **Methods:** The status of insecticide resistance among indoor and outdoor resting anopheline  
35 mosquitoes was compared in *Anopheles* mosquitoes collected from Kisumu and Bungoma  
36 counties in Western Kenya. The level and intensity of resistance were measured using WHO-tube  
37 and CDC-bottle bioassays, respectively. The synergist piperonyl butoxide (PBO) was used to  
38 determine if metabolic activity (monooxygenase enzymes) explained the resistance observed. The  
39 mutations at the voltage-gated sodium channel (*Vgsc*) gene and *Ace 1* gene were characterized  
40 using PCR methods. Microplate assays were used to measure levels of detoxification enzymes if  
41 present.

42 **Results:** A total of 1094 samples were discriminated within *Anopheles gambiae s.l.* and 289 within  
43 *An. funestus s.l.* In Kisian (Kisumu county), the dominant species was *Anopheles arabiensis*  
44 75.2% (391/520) while in Kimaeti (Bungoma county) collections the dominant sibling species was  
45 *Anopheles gambiae s.s* 96.5% (554/574). The *An. funestus s.l* samples analysed were all *An.*  
46 *funestus s.s* from both sites. Pyrethroid resistance of *An.gambiae s.l* F1 progeny was observed in  
47 all sites. Lower mortality was observed against deltamethrin for the progeny of indoor resting  
48 mosquitoes compared to outdoor resting mosquitoes (Mortality rate: 37% vs 51%, P=0.044). The  
49 intensity assays showed moderate-intensity resistance to deltamethrin in the progeny of  
50 mosquitoes collected from indoors and outdoors in both study sites. In Kisian, the frequency of  
51 *vgsc*-L1014S and *vgsc*-L1014F mutation was 0.14 and 0.19 respectively in indoor resting malaria  
52 mosquitoes while those of the outdoor resting mosquitoes were 0.12 and 0.12 respectively. The  
53 *ace 1* mutation was present in higher frequency in the F1 of mosquitoes resting indoors (0.23)  
54 compared to those of mosquitoes resting outdoors (0.12). In Kimaeti, the frequencies of *vgsc*-  
55 L1014S and *vgsc*-L1014F were 0.75 and 0.05 respectively for the F1 of mosquitoes collected  
56 indoors whereas those of outdoor resting ones were 0.67 and 0.03 respectively. The *ace 1* G119S  
57 mutation was present in progeny of mosquitoes from Kimaeti resting indoors (0.05) whereas it was  
58 absent in those resting outdoors. Monooxygenase activity was elevated by 1.83 folds in Kisian  
59 and by 1.33 folds in Kimaeti for mosquitoes resting indoors than those resting outdoors  
60 respectively.

61 **Conclusion:** The study recorded high phenotypic, metabolic and genotypic insecticide resistance  
62 in indoor resting populations of malaria vectors compared to their outdoor resting counterparts.  
63 The indication of moderate resistance intensity for the indoor resting mosquitoes is alarming as it  
64 could have an operational impact on the efficacy of the existing pyrethroid based vector control  
65 tools. The use of synergist (PBO) in LLINs may be a better alternative for widespread use in these  
66 regions recording high insecticide resistance.

67 **Keywords:** *Anopheles gambiae*, *Anopheles arabiensis*, *Anopheles funestus*, insecticide resistance,  
68 Indoor and outdoor resting behavior, Western Kenya

70 **Introduction**

71 Decline in malaria incidence and prevalence have been achieved in sub-Saharan Africa through  
72 the widespread use of anti-malarial drug therapies and scaling up of vector control interventions  
73 that primary target malaria vectors feeding and resting indoor [1]. Despite the observed  
74 improvement in malaria incidence and prevalence in many parts of sub-Saharan Africa,  
75 transmission is increasing in several countries [2,3]. The ongoing transmission has been partly  
76 attributed to the shifts in mosquito behaviours (biting and resting) due to increasing insecticide use  
77 for vector control [4-7] and increased insecticide resistance in the mosquitoes [8-10]. Malaria  
78 transmission is dependent on the propensity of malaria vectors to feed on human host and  
79 preference to live in close proximity to human dwellings [7].

80 Insecticide resistance in malaria mosquitoes is linked to presence and increase in metabolic  
81 detoxification enzymes, target site insensitivity and behavioural resistance [11]. Metabolic enzyme  
82 detoxification [12] and target site insensitivity [13] are responsible for higher levels of insecticide  
83 resistance [14]. Mechanisms that decrease the insecticide toxicity rely on modifications in one or  
84 several inheritable genes of the mosquito [11]. Detoxification enzyme systems that have been  
85 reported to confer resistance include three major families of enzymes; the cytochrome P450  
86 monooxygenases,  $\beta$ -esterases, and the Glutathione S-transferases. In Western Kenya, about 80%  
87 of reported resistance genotypes are Vgsc-1014S *kdr* mutation, Vgsc-1014F mutations in the major  
88 vectors *Anopheles gambiae s.l.* (*An. gambiae* henceforth) and *Anopheles arabiensis* [15-18]. The  
89 malaria vector *Anopheles arabiensis* has been reported with increasing levels of *kdr* mutations  
90 [19]. There are no reports of *kdr* mutation at the locus 1014 in *Anopheles funestus*, also an  
91 important vector in Western Kenya and many parts of Africa despite having several reports of  
92 metabolic resistance [20-22]. The increasing levels of insecticide resistance in malaria mosquitoes

93 have been associated with continuous exposure to insecticides in Long Lasting Insecticide Nets(  
94 LLINs) [23,24] and agro-chemicals such as pesticides due to the creation of selection pressures  
95 [25-27].

96 Environmental changes have been implicated in the observed vector behavioural modifications, as  
97 mosquitoes could quickly adapt and respond by producing better matching phenotypes to prevent  
98 or reduce the negative consequences in the new environment [7]. For instance, field studies in East  
99 Africa have reported increased zoophagy [23,24,28], feeding outdoors or early evening indoors  
100 [29] and change in resting behaviour either indoor or outdoor [28,30,31]. These behavioural  
101 changes might have been due to selection pressure from increased coverage of LLINs [32-35]. The  
102 scale-up of LLINs in Africa has been associated with a species shift from the highly endophilic  
103 *An. gambiae* to the more exophilic *An. arabiensis* in Kenya [3,36,37]. The intervention pressure  
104 may selectively eliminate the most susceptible species from a population leaving the less  
105 vulnerable species able to adapt to the new environment [38]. While these field studies demonstrate  
106 the influence of environmental changes on the behaviour of malaria vectors. Very little is known  
107 about the association of insecticide resistance and the behaviour of malaria vectors.

108 Given the importance of mosquito feeding and resting behaviour to the successes of malaria vector  
109 control and transmission, it is important to understand the influence of physiological resistance on  
110 the resting behaviour of malaria vectors and how the observed behaviours could impact the  
111 effectiveness of the existing frontline interventions. Currently, the mechanisms underlying the  
112 observed behavioural shifts in malaria vectors are poorly known, and it may have an  
113 epidemiological consequence. In order to maintain the efficacy of insecticide-based vector  
114 control, insecticide resistance must be constantly monitored and management strategies developed  
115 and deployed [8,39-43]. The present study attempts to answer how insecticide use and resistance

116 influences resting behaviours by reporting on the status of insecticide resistance in indoor resting  
117 and outdoor resting malaria vectors.

## 118 **Methods**

### 119 **Study sites**

120 The study was carried out in the lowland site of Kisian (0.0749° S, 34.6663° E, 1,137m) in Kisumu  
121 county and the highland site of Kimaeti (0.6029° N, 34.4073° E, 1,430m) in Bungoma county all  
122 in Western Kenya (Fig. 1). These sites have high abundance of malaria mosquitoes (*An. gambiae*  
123 *s.l.* and *An. funestus s.l.*) and high level of insecticide resistance [15,17]. Kimaeti (Bungoma  
124 county) has extensive tobacco cultivation visible by large farms with numerous curing kilns  
125 observed in the region. In Kisian (Kisumu county), there is sand harvesting from river beds,  
126 fishing, rice and maize farming most of which enhance mosquito breeding habitats. There is  
127 extensive use of agrochemicals on these farms which could have a potential role in the mediation  
128 of resistance to insecticides. Western Kenya experiences long rainy seasons between the months  
129 of March to June and the short rainy seasons between the months of October and November [44].

### 130 **Mosquito Sampling**

131 Resting *Anopheles* mosquitoes were sampled indoors and outdoors from household units.  
132 Mosquito collections were made during the long rainy season (May-July) and the short rainy  
133 season (October-November) of 2019. Prokopack and mouth aspirators were employed to collect  
134 mosquitoes indoors. Outdoor collections were sampled from pit shelters dug (1.5M×1.5M×1.5M)  
135 in the ground [45], from clay pots or containers placed at least 10 meters outside of houses and  
136 from any proximal human outdoor resting points such as cowsheds and under shaded places.  
137 Sampled anophelines were first discriminated using morphological keys [46]. Further species-

138 specific identification within the *An. gambiae s.l.* and *An. funestus s.l.* was conducted using PCR.  
139 Mosquito collections were done at the beginning and at the end of the dry and rainy seasons. This  
140 was done between 0600hrs and 1000 hrs. The samples collected were taken to the entomology  
141 laboratories at the Kenya Medical Research Institute (KEMRI), Center for Global Health Research  
142 (CGHR) for subsequent rearing, phenotypic, biochemical and molecular analyses.

### 143 **Rearing of mosquitoes**

144 Blood-fed and gravid female *Anopheles* mosquitoes from both the indoor and outdoor collections  
145 were aspirated into separate labeled netted mosquito holding cages measuring 30cm × 30cm ×  
146 30cm where they were maintained at  $25 \pm 2^{\circ}\text{C}$  and relative humidity of  $80 \pm 4\%$  with 12:12 hours  
147 of light and dark. They were provided with 10% sucrose solution imbibed in cotton wool.  
148 Oviposition cups were introduced into the cages for egg collection. Since all collections made were  
149 put together in similar cages, the number of mosquitoes that laid eggs was not determined. Eggs  
150 collected were transferred into larval rearing trays containing spring water where they hatched.  
151 The aquatic larval stages were maintained in water  $26\text{-}27^{\circ}\text{C}$  and were fed on a mixture of  
152 Tetramin™ fish food and brewer's yeast. After the four larval stages, pupae were picked and  
153 transferred into netted holding cages in small cups where the emergent adults were provided with  
154 10% sucrose solution [47].

### 155 **Testing phenotypic resistance in the F1 progeny of indoor and outdoor resting mosquitoes**

156 First filial generation (F1) females raised from field-collected adults that were resting either  
157 indoors or outdoors, that were 3-5 -day old, were tested for susceptibility using the standard WHO  
158 tube bioassays (WHO, 2016) against discriminating doses of five insecticides selected from three  
159 classes: (i) Pyrethroids - (0.05% deltamethrin, 0.75% permethrin and (0.05% Alphacypermethrin);

160 and (ii) organophosphate - (5% malathion). For each test about 100-150 mosquitoes were used for  
161 the assay comprising 20-25 mosquitoes for each of four replicates for each of the insecticides and  
162 controls. Silicone oil-treated papers were used as a control for pyrethroid assays while olive oil  
163 was used for the malathion (organophosphate) test. Mosquitoes were exposed for 1 hour for each  
164 insecticide and the number that were knocked down recorded after every 10 mins within the 1-  
165 hour exposure period. After 1-hour exposure to the diagnostic concentrations, mosquitoes were  
166 transferred to recovery cups and maintained on 10% sucrose solution for 24 hrs. Mortality was  
167 defined as the inability of the mosquitoes to stand or to fly in a coordinated manner. Mosquito  
168 survival status was examined at 24-hour post-exposure, where the survived and dead mosquitoes  
169 were collected and preserved at -20°C prior to molecular analysis. Percentage mortality was  
170 calculated for both indoor and outdoor F1 mosquitoes.

#### 171 **Piperonyl butoxide (PBO) synergist bioassays**

172 The involvement of oxidase (P450) resistance mechanism in pyrethroid resistance was determined  
173 by pre-exposing test populations to the oxidase inhibitor; Piperonyl butoxide synergist (PBO).  
174 Briefly, unfed females aged 3-5 days were pre-exposed to 4% PBO impregnated test papers for one  
175 hour. After pre-exposure to PBO, the mosquitoes were immediately exposed to the three  
176 pyrethroids (deltamethrin, permethrin and alphacypermethrin) for an additional hour. One batch  
177 of 25 females was only exposed to 4% PBO without insecticide as a control. After pre-exposure  
178 to PBO and the insecticides, mosquitoes were transferred to holding tubes and supplied with 10%  
179 sugar solution. Mortality was recorded after 24 hours.

#### 180 **Measurement of insecticide resistance intensity in the F1 progeny**

181 Insecticide resistance intensity testing to deltamethrin was determined by using CDC bottle  
182 bioassay with serial dosages. Serial concentrations (1×, 5× and 10×) of deltamethrin were prepared  
183 and used for the CDC bottle assays. The bottles were coated in batches for each working  
184 concentration, to which mosquitoes were exposed as per the CDC procedure guide MR4 [47,48].  
185 The number of knocked-down mosquitoes was recorded every 10 minutes until either all  
186 mosquitoes in the test bottles were dead or it reached 1 hour after the start of the experiment.  
187 Mosquitoes were transferred to holding cups and fed on 10% sucrose solution. Mortality was  
188 recorded after 24-hours.

### 189 **Molecular identification and genotyping of resistance alleles**

190 Genomic DNA was extracted by the alcohol precipitation method and conventional PCR was used  
191 to speciate the samples [47,49,50]. The taqMan assay was used to detect the mutations (*Vgsc*-  
192 1014S, *Vgsc*-1014F and *N1575Y*) at the voltage-gated sodium channel [51,52] and the same set of  
193 samples were used to detect the *G119S* mutation in *Ace I* [53].

### 194 **Biochemical enzyme levels in F1 progeny of indoor and outdoor resting *An. gambiae s.l.***

195 From both sites, indoor and outdoor, 100-three-day old female mosquitoes, were killed by freezing  
196 for 10 minutes and homogenized individually in 0.1 M potassium Phosphate (KPO<sub>4</sub>) buffer as  
197 described by Benedict, (2014). The levels of metabolic enzymes; β-esterases, Glutathione S-  
198 transferase (GST) and Oxidases were measured using microplate enzyme assays. To correct for  
199 variations in mosquito sizes, the protein content of each mosquito was measured by adding 20μl  
200 of mosquito homogenate to the microtiter plates in triplicates and 80μl of KPO<sub>4</sub> to each well after  
201 which 200μl of protein-dye reagent was topped up. A standard curve was used to relate amount of  
202 protein used. The absorbances were taken using a microplate reader [47,54,55].



## 203 **Data analysis**

204 The phenotypic resistance assays were expressed as proportions of mortality around 95%  
205 confidence interval and classified by WHO (2016) as a guide. Genotypic data for species  
206 identification was weighted as proportions of the samples assessed. The allele frequencies for  
207 resistant genotypes were calculated using the Hardy-Weinberg equilibrium equation. Metabolic  
208 resistance enzymes were analyzed by ANOVA after which the source of variation between the  
209 fold changes was determined by the Turkey-Kramer HSD test. All statistical analyses were done  
210 in R software version 3.6.3.

## 211 **Ethical considerations**

212 Scientific and ethical clearance was sought from the Kenya Medical Research Institute Scientific  
213 and Ethics Review Unit (SERU) under protocol number SERU 3616. The household heads and  
214 property owners were consulted and oral consent was obtained during indoor and outdoor  
215 mosquito sampling.

## 216 **RESULTS**

### 217 **Species discrimination of *An. gambiae s.l.* and *An. funestus s.l.***

218 A total of 1094 samples were identified to species within the *An. gambiae s.l.* and 289 from the  
219 *An. funestus s.l.* from the two sites. In the lowland site of Kisian (Kisumu county), out of 520 *An.*  
220 *gambiae s.l.* samples analysed, *An. arabiensis* composition was 75.2% (95% CI; 71.5-78.9%)  
221 while *An. gambiae s.s.* was 24.8% (95% CI; 21.1-28.5%) . All 122 *An. funestus s.l.* samples  
222 analysed from indoors were *An. funestus s.s.* (Table 1). In the highland site of Kimaeti (Bungoma  
223 county) out of 574 *An. gambiae s.s.* composition was 96.5% (95% CI; 95.0-98.0%) while *An.*  
224 *arabiensis* was 3.5% (95% CI; 2.0-5.0%). The 167 *An. funestus s.l.* analysed were all *An. funestus*  
225 *s.s.* (Table 1).

## 226 **Phenotypic resistance in the F1 progeny of indoor and outdoor mosquitoes**

227 A total of 2,800 female *An. gambiae s.l.* (Kisan=1,400 and Kimaeti=1,400) and 1,600 female *An.*  
228 *funestus s.l.* (Kisan=800 and Kimaeti=800) were used in the WHO tube assays. In the lowland site  
229 of Kisian, the mortality rate of the indoor resting *An. gambiae s.l.* mosquitoes exposed to  
230 deltamethrin was significantly lower than outdoors resting ones (37% ,95% [CI; 28-46%]) vs 51%  
231 [95% CI; 41-61%] respectively;  $t=2.035$ ,  $df=6$ ,  $P=0.044$ ). The indoor resting *An. gambiae s.l.* had  
232 significantly lower mortality rate to permethrin than those resting outdoors (31% [95% CI; 22-  
233 40%] vs 51% [95% CI; 41-61%],  $t=2.078$ ,  $df=6$ ,  $P=0.042$ ). Following exposure to  
234 alphacypermethrin, the mortality rate for indoor resting *An. gambiae s.l.* was 30% (95% CI; 21-  
235 39%) compared to their outdoor counterparts with 60% (95% CI; 50-70%) ( $t=4.392$ ,  $df=6$ ,  
236  $P<0.05$ ). There was 100% mortality for both the indoor resting and outdoor resting *Anopheles*  
237 *gambiae s.l.* when exposed to malathion. (Fig 2a)

238 Indoor resting F1 progeny raised from *Anopheles gambiae s.l.* collected from the highland site of  
239 Kimaeti had a mortality rate of 49% (95% CI; 39-59%) compared to those resting outdoors 53%  
240 (95% CI; 43-63%) when exposed to deltamethrin. Although the indoor resting mosquitoes showed  
241 a slightly lower mortality rate compared to outdoors, this was not statistically significant ( $t=0.474$ ,  
242  $df=6$ ,  $P>0.05$ ). Exposure of mosquitoes to permethrin showed for indoor resting mosquitoes had  
243 a significantly lower mortality 7% (95% CI; 1-12%) compared to those resting outdoors 51% (95%  
244 CI; 41-61%), ( $t=6.063$ ,  $df=6$ ,  $P<0.001$ ). Mosquitoes exposed to alphacypermethrin on the other  
245 hand showed a mortality rate of 70% (95% CI; 61-79%) for indoor resting mosquitoes compared  
246 to those resting outdoors outdoors80% (95% CI; 72-88%), though this was not significantly  
247 different ( $t=1.058$ ,  $df=6$ ,  $P>0.05$ ). Exposure of mosquitoes from the indoor or outdoor location in  
248 showed that *An gambiae s.l.* were fully susceptible to malathion with 100% mortality (Fig 2a).

249 Addition of PBO synergist to the test, partially restored the resistance of indoor resting mosquitoes  
250 from 37% to 96% for deltamethrin ( $t=9.0$ ,  $df=6$ ,  $P<0.001$ ), 31% to 79% permethrin ( $t=5.908$ ,  $df=6$   
251  $P=0.005$ ) and 30% to 92% for alphacypermethrin ( $t=8.598$ ,  $df=6$ ,  $P<0.001$ ) in Kisian. The effects  
252 of the PBO synergist was evident in the outdoor resting mosquitoes with mortality rate range;  
253 98%-100% for the three pyrethroids used, confirming the full involvement of monooxygenase  
254 enzyme activity in the pyrethroid detoxification (Fig 2a).

255 In Kimaeti, the addition of PBO to tests involving indoor resting *An. gambiae s.l.* showed  
256 significantly increased mortality rate from 49% to 100% ( $t =7.095$ ,  $df=6$ ,  $P<0.001$ ) for  
257 deltamethrin, 7% to 95% ( $t=16.436$ ,  $df=6$ ,  $P<0.001$ ) for permethrin and 70% to 99% ( $t=5.385$ ,  
258  $df=6$ ,  $P=0.001$ ) for alphacypermethrin. The effects of the PBO synergist was also seen in outdoor  
259 resting mosquitoes with the mortality rate ranging between 94% and 100% (Fig 2a).

260 Due to the small number collected outdoors and the general difficulty in raising the F1, only indoor  
261 *An. funestus s.l.* from both study sites were assayed. In Kisian, the mortality rate of *An. funestus*  
262 was 68% (95% CI; 59-77%) to deltamethrin, 74% (95% CI; 65-83%) to permethrin and 77% (95%  
263 CI; 69-85%) to alphacypermethrin (Fig 2b). In Kimaeti, the F1 of *An. funestus* showed mortality  
264 rates of 62% (95% CI; 52-72%) when exposed to deltamethrin, 89% (95% CI; 83-95%) to  
265 permethrin and 61% (95% CI; 51-71%) following alphacypermethrin exposure. There was 100%  
266 mortality across both sites with PBO pre-exposure (Fig. 2b)

267 **Intensity of insecticide resistance in F1 of *An. gambiae s.l.* resting indoors and outdoors**

268 The mortality rate for indoor *An. gambiae s.l.* from Kisian that were exposed to 1×, 5× and 10×  
269 of the diagnostic doses of deltamethrin was 42% (95% CI; 32-52%), 78% and 100% respectively  
270 whilst for outdoors was 51% (95% CI; 41-61%), 83% (95% CI; 76-90%) and 100%, indicating  
271 moderate-intensity resistance across both locations according to the WHO 2016 criteria [56] (Fig.  
272 3). Although there was lower mortality among the indoor resting mosquitoes compared to their  
273 outdoor counterparts at 1× (t=1.269, df=6, P=0.130) and at 5× (t=0.823, df=6, P=0.221), this was  
274 not statistically significant (Fig 3).

275 The mortality rate of indoor resting population from Kimaeti exposed to 1×, 5× and 10×  
276 concentration of deltamethrin were 31% (95% CI; 22-40%), 75% (95% CI; 67-83%) and 100%  
277 respectively while the outdoors were 48% (95% CI; 38-58%), 80% (95% CI; 72-88%) and 100%  
278 respectively indicating moderate-intensity resistance in both locations according to the WHO 2016  
279 criteria [56]. Similarly, even though the mortality rates were lower indoors than outdoors, there  
280 was no significant statistical difference between the two populations at 1× (t=1.512, df=6, P>0.05)  
281 and at 5× (t=0.808, df=6, P>0.05) (Fig. 3).

282

283 **Target site genotyping for resistance alleles in the F1 of indoor and outdoor resting *An.***  
284 ***gambiae s.l.***

285 In Kisian, the frequency of the vgsc L1014S and L1014F in the progeny of mosquitoes resting  
286 indoors were present with frequencies of 0.14 and 0.19 respectively for the F1 of indoor resting  
287 mosquitoes whereas those raised from mosquitoes resting outdoors were 0.14 and 0.12  
288 respectively. The *ace I* mutation was present by higher frequency in the F1 of mosquitoes resting

289 indoors (0.23) compared to those of the ones resting outdoors (0.12). The vgsc-1014S and *ace 1*  
290 mutations were not observed in *An. gambiae* from Kisian due to the small sample size.

291 The frequency of L1014S and L1014F present in mosquitoes collected indoors were 0.75 and 0.05  
292 respectively in Kimaeti compared to those raised from mosquitoes collected outdoors (0.67 and  
293 0.03 respectively). The *ace 1* G119S mutation was observed in the F1 of mosquitoes resting  
294 indoors with a frequency of 0.05 and was not present in those of mosquitoes resting outdoors. The  
295 *kdr* point mutation at locus 1575Y was not present in both study sites (Table 2).

296

### 297 **Biochemical enzyme levels in F1 progeny of indoor and outdoor resting *An. gambiae s.l.***

298 The monooxygenases,  $\beta$ -Esterase and Glutathione S-transferases activities were analyzed to  
299 determine the level of involvement in the F1 of *An. gambiae s.l.* insecticide resistance. In Kisian,  
300 the monooxygenase activity was increased by 1.83 folds in the progeny of *An. gambiae s.l.* resting  
301 indoors and by 1.66-folds for those resting outdoors when compared to the insectary reference  
302 Kisumu strain ( $F_{2,134}=105.20$ ,  $P<0.05$ , Fig. 4a). The  $\beta$ -Esterases fold change was not significantly  
303 different between F1 progeny raised from indoor and outdoor resting *An. gambiae s.l.* mosquitoes  
304 ( $F_{2,134}=188.50$ ,  $P<0.05$ , Fig. 4b). In Kisian, the elevation of GSTs was by a 2.3-fold change in the  
305 F1 of indoor-resting mosquitoes which was significantly higher than that of the F1 of those resting  
306 outdoors ( $F_{2,134}=95.14$ ,  $P<0.05$ , Fig. 4c).

307 The enzyme activity of monooxygenases was higher by 1.3-fold in the indoor population from  
308 Kimaeti compared to the outdoor population ( $F_{2,134}=51.43$ ,  $P<0.05$ , Fig 4a). The activity of  $\beta$ -  
309 esterases from Kimaeti was elevated by 1.2 folds for the indoor-resting population which was  
310 significantly different compared to that of the outdoor resting mosquitoes ( $F_{2,134}=36.66$ ,  $P<0.001$ ,

311 Fig. 4b). The activity of Glutathione S-transferase was elevated by a 3.0-fold change in the progeny  
312 of mosquitoes found resting indoors than those found resting outdoors ( $F_{2,134}=119.9$ ,  $P<0.05$ ). (Fig.  
313 4c).

314 **DISCUSSION**

315 This study set out to determine the level of insecticide resistance of *Anopheles* mosquito species  
316 between populations found resting indoors and those resting outdoors. Generally, high phenotypic,  
317 physiological (genotypic and metabolic) resistance was observed in the progeny of indoor resting  
318 malaria mosquitoes than the outdoor resting vectors.

319 In the lowland sites of Kisian (Kisumu county), *An. arabiensis* was the most abundant malaria  
320 vector compared to its sibling species *An. gambiae s.s.* whereas in Kimaeti (Bungoma county), the  
321 dominant species was *An. gambiae s.s.* similar to earlier reports [17,21,28,57,58]. The lowlands  
322 tend to have high temperatures and low humidity which favour the more resilient *An arabiensis*  
323 whereas in the highlands, there are low temperatures and high relative humidity which favour *An*  
324 *gambiae* [59].

325 The indoor population recorded high phenotypic resistance to pyrethroids than outdoors. The  
326 phenotypic insecticide resistance to pyrethroids in *An. gambiae s.l.* is widespread in Western  
327 Kenya evident in previous studies [15,17,19]. The resistance to pyrethroids by *An. funestus* was  
328 observed and has as well been reported before [60]. These regions of Western Kenya have been  
329 reported to have increasing resistance to pyrethroids which are the public health approved  
330 insecticides for use in LLINs [15,17,20,42]. There was 100% susceptibility to malathion of  
331 mosquitoes just as similar studies have shown in Ghana [61]. Synergist PBO pre-exposure restored  
332 susceptibility for both indoor and outdoor resting mosquitoes, revealing the role of detoxifying  
333 metabolic enzymes in the insecticide resistance in these regions. This means, therefore, that there  
334 are more factors at play contributing to the insecticide resistance present in Western Kenya similar  
335 to studies before [12,62,63]. Increasing the concentration of the deltamethrin in CDC bottle assays  
336 restored susceptibility to 100% suggesting that the continuous exposure to the current dosage in

337 LLINs and possible interaction with non-lethal doses in agricultural chemicals could have been at  
338 play to contribute to the development of resistance to pyrethroids as previously demonstrated [38]  
339 in indoor resting and outdoor resting malaria mosquitoes. The result showed moderate intensity  
340 insecticide resistance since the mosquitoes succumbed to the highest concentration according to  
341 the WHO test procedures for insecticide resistance monitoring in malaria vectors [56]. The buildup  
342 of the phenotypic resistance which was higher in indoor resting mosquitoes compared to the  
343 outdoor resting counterparts might be threatening current insecticide-based malaria control  
344 interventions as suggested by prior studies [64,65].

345 The presence of resistance-associated point mutations was more in indoor resting mosquitoes than  
346 their outdoor resting counterparts. This can be attributed to the adaptations from selection  
347 pressures due to constant exposure to insecticide-based interventions such as LLINs [17,23,39,66]  
348 and the extensive chemicals used in the tobacco farms in Kimaeti. The study also detected, even  
349 though in lower frequencies, a significant proportion of the *vgsc*-1014S and 1014F in *An.*  
350 *arabiensis* a phenomenon that has been previously reported [17,19,63]. This is in line with studies  
351 that have shown the occurrence of more than one *kdr* associated point mutation within a population  
352 of *An. gambiae s.l.* already reported previously [17,20,58,63,67]. The significant *vgsc* mutations  
353 observed could be a result of selection pressure build-up that is due to more contact with  
354 insecticides in indoor-based interventions [17,39,42,58,63]. From Kisian, the *G119S* mutation was  
355 present at low frequencies even though it was higher in the progeny of mosquitoes resting indoors  
356 compared to those resting outdoors. This was more in Kisian, where the *vgsc* mutations were at  
357 lower frequencies than in Kimaeti. These findings suggest that these mutations could be arising  
358 from different pressures that could be present in the lowland and absent in the highland.



359 The metabolic enzymes, associated with insecticide resistance (monooxygenases,  $\beta$ -esterases, and  
360 glutathione S-transferases) activities were found to be elevated, more in indoor resting malaria  
361 mosquitoes compared to the outdoor counterparts from both sites. From the phenotypic assays,  
362 pre-exposure to PBO synergist restored the susceptibility of the malaria vectors to the pyrethroids  
363 commonly used in LLINs by public health. Phenotypic exposures with prior PBO contact  
364 demonstrated more activity of monooxygenases in aiding metabolic resistance. The involvement  
365 of monooxygenases in pyrethroid resistance has been reported in Western Kenya [17]. In Kimaeti,  
366 there was increased levels  $\beta$ -esterases, higher indoors than outdoors. Kisian, on the other hand, did  
367 not show involvement of  $\beta$ -esterases in contributing to resistance as shown by similar levels in  
368 indoor and outdoor resting mosquitoes. The glutathione-S-transferase possibly played a part in the  
369 resistance levels as a previous study reported [68] since it was higher in mosquitoes resting indoors  
370 than those resting outdoors from both Kisian and Kimaeti. These levels, therefore, suggest that  
371 monooxygenases were the main mechanism of insecticide resistance in Kisian, especially with the  
372 low frequency of resistant alleles, whereas in Kimaeti, the case pointed be a combination of  
373 genotypic and metabolic mechanisms.

374 The expression of phenotypic, genotypic and metabolic resistance appears to be higher in indoor  
375 than outdoor resting malaria mosquitoes in these regions. The widespread use of LLINs in attempts  
376 to controlling these vectors and the extensive agrochemical use could be strengthening the increase  
377 of insecticide resistance in the sites [21,58]. The higher levels indoors suggest that these  
378 mosquitoes could be resting indoors because they are adequately resistant to the insecticides used  
379 in LLINs, posing a threat to the wide coverage LLINs [21]. On the other hand, outdoors, the  
380 resistance mechanisms were present as well pointing to exposure to these insecticide-based  
381 interventions in just enough pressure to elicit expression of the resistance traits. The levels of

382 resistance could be enough to elicit an increase in malaria incidence due to the reduced mortality  
383 of resistant malaria vectors that could hinder current vector control interventions [64].

### 384 **Conclusion**

385 In this study there was high phenotypic, genotypic and metabolic insecticide resistance in indoor  
386 resting malaria vectors (*An. gambiae s.l* and *An. funestus*) compared to outdoor-resting  
387 mosquitoes. Indoor-based insecticide control interventions are potentially at the verge of becoming  
388 obsolete due to the reduced efficacy in controlling resistant malaria vectors which in turn might  
389 lead to rise in malaria incidence. This calls for urgent improvement of these interventions and  
390 development of alternative tools for indoor malaria control coupled with strengthening of  
391 insecticide resistance monitoring. The use of synergist (PBO) in LLINs may be a better alternative  
392 for widespread use in these regions recording high insecticide resistance.

393

### 394 **Authors' contribution**

395 KOO, MM, WRM, EO, GY and YAA designed the study and drafted the final manuscript. KOO,  
396 MM participated in data collection, performed laboratory work, analysed data and drafted the  
397 initial manuscript. WRM, EO, GY and YAA, supervised data collection. All authors have read and  
398 approved the final manuscript.

### 399 **Acknowledgments**

400 The authors wish to thank the villagers and community leaders for their permission to collect  
401 mosquitoes in their houses. In particular, we thank the community leaders. We acknowledge the  
402 Entomology Laboratory at Kenya Medical Research Institute, Kisumu, more specific Joyce K.  
403 Ogoro, Mathew Kipsum, Christabel A. Winter, Duncan O. Tindi and Benard O. Alele for providing

404 technical support and laboratory space for the study. This paper is published with permission from  
405 the director of Kenya Medical Research Institute.

406

407 **Ethics approval and consent to participate**

408 Ethical approval for the study was obtained from Ethical Review Board of Kenya Medical  
409 Research Institute under number SERU 3613. Permission was sought from community leaders of  
410 each study site. Informed consent was obtained from the household heads. For mosquito larvae  
411 collection, oral consent was obtained from field owners in each location. These locations were not  
412 protected land, and the field studies did not involve endangered or protected species.

413 **Competing interest**

414 The authors declare that they have no competing interests.

415 **Availability of data and materials**

416 All relevant data are within the paper and its supporting information files

417 **Funding**

418 This study was supported by grants from the National Institute of Health (R01 A1123074, U19  
419 AI129326, R01 AI050243, D43 TW001505)

## 420 **References**

- 421 1. WHO (2019) World Malaria Report 2019: World Health Organization.
- 422 2. Mwesigwa J, Okebe J, Affara M, Di Tanna GL, Nwakanma D, et al. (2015) On-going malaria  
423 transmission in The Gambia despite high coverage of control interventions: a nationwide  
424 cross-sectional survey. 14: 1-9.
- 425 3. Zhou G, Afrane YA, Vardo-Zalik AM, Atieli H, Zhong D, et al. (2011) Changing patterns of  
426 malaria epidemiology between 2002 and 2010 in western Kenya: The fall and rise of  
427 malaria. PLoS ONE 6.
- 428 4. Sougoufara S, Diédhiou SM, Doucouré S, Diagne N, Sembène PM, et al. (2014) Biting by  
429 *Anopheles funestus* in broad daylight after use of long-lasting insecticidal nets: a new  
430 challenge to malaria elimination. 13: 1-7.
- 431 5. Reddy MR, Overgaard HJ, Abaga S, Reddy VP, Caccone A, et al. (2011) Outdoor host seeking  
432 behaviour of *Anopheles gambiae* mosquitoes following initiation of malaria vector control  
433 on Bioko Island, Equatorial Guinea. 10: 184.
- 434 6. Russell TL, Govella NJ, Azizi S, Drakeley CJ, Kachur SP, et al. (2011) Increased proportions  
435 of outdoor feeding among residual malaria vector populations following increased use of  
436 insecticide-treated nets in rural Tanzania. 10: 80.
- 437 7. Takken W, Verhulst NO, Aroe (2013) Host preferences of blood-feeding mosquitoes. 58: 433-  
438 453.
- 439 8. Hughes A, Lissenden N, Viana M, Toé KH, Ranson HJP, et al. (2020) *Anopheles gambiae*  
440 populations from Burkina Faso show minimal delayed mortality after exposure to  
441 insecticide-treated nets. 13: 17.
- 442 9. Omondi S, Mukabana WR, Ochomo E, Muchoki M, Kemei B, et al. (2017) Quantifying the  
443 intensity of permethrin insecticide resistance in *Anopheles* mosquitoes in western Kenya.  
444 10: 548.
- 445 10. Knox TB, Juma EO, Ochomo EO, Jamet HP, Ndungo L, et al. (2014) An online tool for  
446 mapping insecticide resistance in major *Anopheles* vectors of human malaria parasites and  
447 review of resistance status for the Afrotropical region. 7: 76.
- 448 11. Liu NJ, Aroe (2015) Insecticide resistance in mosquitoes: impact, mechanisms, and research  
449 directions. 60: 537-559.

- 450 12. Hemingway J, Hawkes NJ, McCarroll L, Ranson HJ, biology m (2004) The molecular basis  
451 of insecticide resistance in mosquitoes. 34: 653-665.
- 452 13. Hemingway J, Ranson HJ, Aroe (2000) Insecticide resistance in insect vectors of human disease.  
453 45: 371-391.
- 454 14. Brogdon WG, JPT (1989) Biochemical resistance detection: an alternative to bioassay. 5: 56-  
455 60.
- 456 15. Wanjala CL, Mbugi JP, Ototo E, Gesuge M, Afrane YA, et al. (2015) Pyrethroid and DDT  
457 resistance and organophosphate susceptibility among *Anopheles* spp. mosquitoes, western  
458 Kenya. 21: 2178.
- 459 16. Bonizzoni M, Afrane Y, Dunn WA, Atieli FK, Zhou G, et al. (2012) Comparative  
460 transcriptome analyses of deltamethrin-resistant and-susceptible *Anopheles gambiae*  
461 mosquitoes from Kenya by RNA-Seq. 7.
- 462 17. Ochomo E, Bayoh M, Brogdon W, Gimnig J, Ouma C, et al. (2012) Pyrethroid resistance in  
463 *Anopheles gambiae* ss and *Anopheles arabiensis* in western Kenya: phenotypic, metabolic  
464 and target site characterizations of three populations. 27: 156-164.
- 465 18. Mathias DK, Ochomo E, Atieli F, Ombok M, Bayoh MN, et al. (2011) Spatial and temporal  
466 variation in the *kdr* allele L1014S in *Anopheles gambiae* ss and phenotypic variability in  
467 susceptibility to insecticides in Western Kenya. 10: 10.
- 468 19. Hemming-Schroeder E, Strahl S, Yang E, Nguyen A, Lo E, et al. (2018) Emerging pyrethroid  
469 resistance among *Anopheles arabiensis* in Kenya. 98: 704-709.
- 470 20. Kawada H, Futami K, Komagata O, Kasai S, Tomita T, et al. (2011) Distribution of a  
471 knockdown resistance mutation (L1014S) in *Anopheles gambiae* ss and *Anopheles*  
472 *arabiensis* in Western and Southern Kenya. 6.
- 473 21. Ochomo, Eric O, Bayoh NM, Walker ED, Abongo BO, et al. (2013) The efficacy of long-  
474 lasting nets with declining physical integrity may be compromised in areas with high levels  
475 of pyrethroid resistance. *Malaria Journal* 12: 368.
- 476 22. Machani MG, Ochomo E, Amimo F, Kosgei J, Munga S, et al. (2019).
- 477 23. Lindblade KA, Mwandama D, Mzilahowa T, Steinhardt L, Gimnig J, et al. (2015) A cohort  
478 study of the effectiveness of insecticide-treated bed nets to prevent malaria in an area of  
479 moderate pyrethroid resistance, Malawi. 14: 31.

- 480 24. Moshi IR, Ngowo H, Dillip A, Msellemu D, Madumla EP, et al. (2017) Community  
481 perceptions on outdoor malaria transmission in Kilombero Valley, Southern Tanzania. 16:  
482 274.
- 483 25. Diabate A, Baldet T, Chandre F, Akoobeto M, Guiguemde TR, et al. (2002) The role of  
484 agricultural use of insecticides in resistance to pyrethroids in *Anopheles gambiae* sl in  
485 Burkina Faso. 67: 617-622.
- 486 26. Nkya TE, Poupardin R, Laporte F, Akhouayri I, Mosha F, et al. (2014) Impact of agriculture  
487 on the selection of insecticide resistance in the malaria vector *Anopheles gambiae*: a  
488 multigenerational study in controlled conditions. 7: 1-12.
- 489 27. Reid MC, McKenzie FEJMj (2016) The contribution of agricultural insecticide use to  
490 increasing insecticide resistance in African malaria vectors. 15: 107.
- 491 28. Bayoh MN, Walker ED, Kosgei J, Ombok M, Olang GB, et al. (2014) Persistently high  
492 estimates of late night, indoor exposure to malaria vectors despite high coverage of  
493 insecticide treated nets. 7: 380.
- 494 29. Lindblade K, Gimnig J, Kamau L, Hawley W, Odhiambo F, et al. (2014) Impact of sustained  
495 use of insecticide-treated bednets on malaria vector species distribution and culicine  
496 mosquitoes. 43: 428-432.
- 497 30. Pates H, Curtis CJARE (2005) Mosquito behavior and vector control. 50: 53-70.
- 498 31. Killeen GF, Kihonda J, Lyimo E, Oketch FR, Kotas ME, et al. (2006) Quantifying behavioural  
499 interactions between humans and mosquitoes: evaluating the protective efficacy of  
500 insecticidal nets against malaria transmission in rural Tanzania. 6: 1-10.
- 501 32. Braimah N, Drakeley C, Kweka E, Mosha F, Helinski M, et al. (2005) Tests of bednet traps  
502 (Mbita traps) for monitoring mosquito populations and time of biting in Tanzania and  
503 possible impact of prolonged insecticide treated net use. 25: 208-213.
- 504 33. Killeen GF, Marshall JM, Kiware SS, South AB, Tusting LS, et al. (2017) Measuring,  
505 manipulating and exploiting behaviours of adult mosquitoes to optimise malaria vector  
506 control impact. 2: e000212.
- 507 34. Perugini E, Guelbeogo WM, Calzetta M, Manzi S, Virgillito C, et al. (2020) Behavioural  
508 plasticity of *Anopheles coluzzii* and *Anopheles arabiensis* undermines LLIN community  
509 protective effect in a Sudanese-savannah village in Burkina Faso. 13: 1-10.

- 510 35. Mayagaya VS, Nkwengulila G, Lyimo IN, Kihonda J, Mtambala H, et al. (2015) The impact  
511 of livestock on the abundance, resting behaviour and sporozoite rate of malaria vectors in  
512 southern Tanzania. 14: 17.
- 513 36. Mutuku FM, King CH, Mungai P, Mbogo C, Mwangangi J, et al. (2011) Impact of insecticide-  
514 treated bed nets on malaria transmission indices on the south coast of Kenya. *Malaria*  
515 *journal* 10: 356.
- 516 37. Githeko A, Ototo E, Guiyun Y (2012) Progress towards understanding the ecology and  
517 epidemiology of malaria in the western Kenya highlands: opportunities and challenges for  
518 control under climate change risk. *Acta tropica* 121: 19-25.
- 519 38. Lindblade K, Gimnig J, Kamau L, Hawley W, Odhiambo F, et al. (2006) Impact of Sustained  
520 Use of Insecticide-Treated Bednets on Malaria Vector Species Distribution and Culicine  
521 Mosquitoes. 43: 428-432.
- 522 39. Ranson H, Lissenden NJTip (2016) Insecticide resistance in African Anopheles mosquitoes: a  
523 worsening situation that needs urgent action to maintain malaria control. 32: 187-196.
- 524 40. Chanda E, Hemingway J, Kleinschmidt I, Rehman AM, Ramdeen V, et al. (2011) Insecticide  
525 resistance and the future of malaria control in Zambia. 6.
- 526 41. WHO (2012) Global plan for insecticide resistance management in malaria vectors.
- 527 42. Ochomo E, Bayoh NM, Kamau L, Atieli F, Vulule J, et al. (2014) Pyrethroid susceptibility of  
528 malaria vectors in four Districts of western Kenya. *Parasites & Vectors* 7: 310.
- 529 43. Sougoufara S, Doucouré S, Sembéne PMB, Harry M, Sokhna CJJovbd (2017) Challenges for  
530 malaria vector control in sub-Saharan Africa: resistance and behavioral adaptations in  
531 Anopheles populations. 54: 4.
- 532 44. Mugalavai EM, Kipkorir EC, Raes D, Rao MSJA, meteorology f (2008) Analysis of rainfall  
533 onset, cessation and length of growing season for western Kenya. 148: 1123-1135.
- 534 45. Muirhead-Thomson RJBotWHO (1958) A pit shelter for sampling outdoor mosquito  
535 populations. 19: 1116.
- 536 46. Gillies M, Coetzee MJPSAIMR (1987) A supplement to the Anophelinae of Africa South of  
537 the Sahara. 55: 1-143.
- 538 47. Benedict M (2014) *Methods in Anopheles research*.
- 539 48. Brogdon W, Chan AJUCA (2010) *Guideline for evaluating insecticide resistance in vectors*  
540 *using the CDC bottle bioassay*.

- 541 49. Scott JA, Brogdon WG, Collins FHJTAjotm, hygiene (1993) Identification of single specimens  
542 of the *Anopheles gambiae* complex by the polymerase chain reaction. 49: 520-529.
- 543 50. Collins FH, Mendez MA, Rasmussen MO, Mehaffey PC, Besansky NJ, et al. (1987) A  
544 ribosomal RNA gene probe differentiates member species of the *Anopheles gambiae*  
545 complex. 37: 37-41.
- 546 51. Bass C, Nikou D, Donnelly MJ, Williamson MS, Ranson H, et al. (2007) Detection of  
547 knockdown resistance (kdr) mutations in *Anopheles gambiae*: a comparison of two new  
548 high-throughput assays with existing methods. 6: 1-14.
- 549 52. Jones CM, Liyanapathirana M, Agossa FR, Weetman D, Ranson H, et al. (2012) Footprints of  
550 positive selection associated with a mutation (N1575Y) in the voltage-gated sodium  
551 channel of *Anopheles gambiae*. 109: 6614-6619.
- 552 53. Bass C, Nikou D, Vontas J, Donnelly MJ, Williamson MS, et al. (2010) The vector population  
553 monitoring tool (VPMT): high-throughput DNA-based diagnostics for the monitoring of  
554 mosquito vector populations. 2010.
- 555 54. Brogdon W, Beach RF, Stewart J, Castanaza LJBotWHO (1988) Microplate assay analysis of  
556 the distribution of organophosphate and carbamate resistance in Guatemalan *Anopheles*  
557 *albimanus*. 66: 339.
- 558 55. Brogdon WG, Barber AMJCb, physiology. B Cb (1990) Microplate assay of glutathione S-  
559 transferase activity for resistance detection in single-mosquito triturates. 96: 339-342.
- 560 56. WHO (2016) Test procedures for insecticide resistance monitoring in malaria vector  
561 mosquitoes.
- 562 57. Degefa T, Yewhalaw D, Zhou G, Lee M-c, Atieli H, et al. (2017) Indoor and outdoor malaria  
563 vector surveillance in western Kenya: implications for better understanding of residual  
564 transmission. 16: 443.
- 565 58. Machani MG, Ochomo E, Amimo F, Kosgei J, Munga S, et al. (2020) Resting behaviour of  
566 malaria vectors in highland and lowland sites of western Kenya: Implication on malaria  
567 vector control measures. 15: e0224718.
- 568 59. Afrane YA, Zhou G, Lawson BW, Githeko AK, Yan GJTAjotm, et al. (2007) Life-table  
569 analysis of *Anopheles arabiensis* in western Kenya highlands: effects of land covers on  
570 larval and adult survivorship. 77: 660-666.



- 571 60. McCann RS, Ochomo E, Bayoh MN, Vulule JM, Hamel MJ, et al. (2014) Reemergence of  
572 *Anopheles funestus* as a vector of *Plasmodium falciparum* in western Kenya after long-  
573 term implementation of insecticide-treated bed nets. 90: 597-604.
- 574 61. Majidah H-A, Amambua-Ngwa A, Nwakanma D, D'Alessandro U, Awandare GA, et al.  
575 (2020) Insecticide resistance in indoor and outdoor-resting *Anopheles gambiae* in Northern  
576 Ghana. 19: 1-12.
- 577 62. Martinez-Torres D, Chandre F, Williamson M, Darriet F, Berge JB, et al. (1998) Molecular  
578 characterization of pyrethroid knockdown resistance (kdr) in the major malaria vector  
579 *Anopheles gambiae* ss. 7: 179-184.
- 580 63. Ochomo E, Subramaniam K, Kemei B, Rippon E, Bayoh NM, et al. (2015) Presence of the  
581 knockdown resistance mutation, Vgsc-1014F in *Anopheles gambiae* and *An. arabiensis* in  
582 western Kenya. 8: 616.
- 583 64. Churcher TS, Lissenden N, Griffin JT, Worrall E, Ranson HJE (2016) The impact of pyrethroid  
584 resistance on the efficacy and effectiveness of bednets for malaria control in Africa. 5:  
585 e16090.
- 586 65. Protopopoff N, Mosha JF, Lukole E, Charlwood JD, Wright A, et al. (2018) Effectiveness of  
587 a long-lasting piperonyl butoxide-treated insecticidal net and indoor residual spray  
588 interventions, separately and together, against malaria transmitted by pyrethroid-resistant  
589 mosquitoes: a cluster, randomised controlled, two-by-two factorial design trial. 391: 1577-  
590 1588.
- 591 66. Trape J-F, Tall A, Diagne N, Ndiath O, Ly AB, et al. (2011) Malaria morbidity and pyrethroid  
592 resistance after the introduction of insecticide-treated bednets and artemisinin-based  
593 combination therapies: a longitudinal study. 11: 925-932.
- 594 67. Kabula B, Kisinza W, Tungu P, Ndege C, Batengana B, et al. (2014) Co-occurrence and  
595 distribution of East (L1014S) and West (L1014F) African knock-down resistance in *A*  
596 *nopheles gambiae sensu lato* population of Tanzania. 19: 331-341.
- 597 68. Nardini L, Christian RN, Coetzer N, Ranson H, Coetzee M, et al. (2012) Detoxification  
598 enzymes associated with insecticide resistance in laboratory strains of *Anopheles*  
599 *arabiensis* of different geographic origin. 5: 113.

601 **Table 1:** Number and percentage (in brackets) of *An. gambiae s.l.* and *An. funestus s.l.* species  
602 composition from indoor and outdoor resting mosquitoes from Western Kenya

| Site    | location | <i>An. gambiae s.l.</i> (%) |                       | <i>An. funestus s.l.</i> | Total |
|---------|----------|-----------------------------|-----------------------|--------------------------|-------|
|         |          | <i>An.gambiae s.s</i>       | <i>An. arabiensis</i> | <i>An. funestus s.s.</i> |       |
| Kisian  | Indoor   | 83 (30.7)                   | 167 (69.3)            | 122 (19.0)               | 392   |
|         | Outdoor  | 46 (18.4)                   | 204 (81.6)            | 0                        | 250   |
|         | Total    | 129 (24.8)                  | 391 (75.2)            | 122                      | 642   |
| Kimaeti | Indoor   | 304 (99.02)                 | 3 (0.97)              | 167 (23.16)              | 474   |
|         | Outdoor  | 250 (93.6)                  | 17 (6.4)              | 0                        | 267   |
|         | Total    | 554 (96.5)                  | 20 (3.5)              | 167 (23.16)              | 721   |

603

605 **Table 2:** Frequency of resistant alleles (*Kdr* and *Ace1-G119S*) in indoor and outdoor-resting *An.*  
 606 *gambiae* s.s and *An. arabiensis* populations from Western Kenya

| Site    | Location | Species              | n  | Vgsc ( <i>kdr</i> ) |        | Ace 1      |           |
|---------|----------|----------------------|----|---------------------|--------|------------|-----------|
|         |          |                      |    | Locus 1014          |        | Locus 1575 | Locus 119 |
|         |          |                      |    | L1014S              | L1014F | 1575Y      | G119S     |
| Kisian  | Indoor   | <i>An.gambiae</i>    | 8  | 0                   | 0.25   | 0          | 0         |
|         |          | <i>An.arabiensis</i> | 36 | 0.14                | 0.19   | 0          | 0.23      |
|         | Outdoor  | <i>An.gambiae</i>    | 1  | 0                   | 0      | 0          | 0         |
|         |          | <i>An.arabiensis</i> | 43 | 0.14                | 0.12   | 0          | 0.12      |
|         | Total    | <i>An. gambiae</i>   | 9  | 0                   | 0.33   | 0          | 0         |
|         |          | <i>An.arabiensis</i> | 79 | 0.08                | 0.06   | 0          | 0.19      |
| Kimaeti | Indoor   | <i>An.gambiae</i>    | 43 | 0.75                | 0.05   | 0          | 0.05      |
|         |          | <i>An.arabiensis</i> | 1  | 0.01                | 0      | 0          | 0         |
|         | Outdoor  | <i>An.gambiae</i>    | 39 | 0.67                | 0.03   | 0          | 0         |
|         |          | <i>An.arabiensis</i> | 5  | 0.60                | 0      | 0          | 0         |
|         | Total    | <i>An.gambiae</i>    | 82 | 0.72                | 0.06   | 0          | 0.02      |
|         |          | <i>An.arabiensis</i> | 6  | 0.07                | 0      | 0          | 0         |

607

608

609 **List of figures**

610 Figure 1: Map of Western Kenya showing study sites (i) Kisian (lowland) (ii) Kimaeti-Bungoma  
611 (Highland)

612 Figure 2: Percentage mortality rates for indoor and outdoor resting A.) *An gambiae s.l* B.) *An*  
613 *funestus* F1 progeny from Kisian (lowland) and Kimaeti (Highland) using WHO tube  
614 bioassays. Error bars indicate 95% confidence intervals. The 90% mortality threshold for  
615 declaring suspected resistance and 98% mortality threshold for calling full susceptibility  
616 based on the WHO criteria are indicated.

617 Figure 3: Mortality rates of *An. gambiae s.l* F1 progeny from Indoor and Outdoor resting  
618 collections redorded using CDC bottle intensity assays. Error bars indicate 95% confidence  
619 intervals. The 90% mortality threshold for declaring suspected resistance and 98%  
620 mortality threshold for calling full susceptibility based on the WHO criteria are indicated.

621 Figure 4: Metabolic enzyme activity for indoor and outdoor resting F1 progeny of *An. gambiae*  
622 from Kisian and Kimaeti in western Kenya. A: monooxygenases; B:  $\beta$ -esterases; and C:  
623 Glutathione S-transferase. Enzyme activities were expressed as the ratio of a population of  
624 interest to the Kisumu reference strain. Error bars indicates 95% confidence intervals. \*,  $P$   
625  $< 0.05$ ; \*\*\*,  $P < 0.001$ ; NS; not significant.



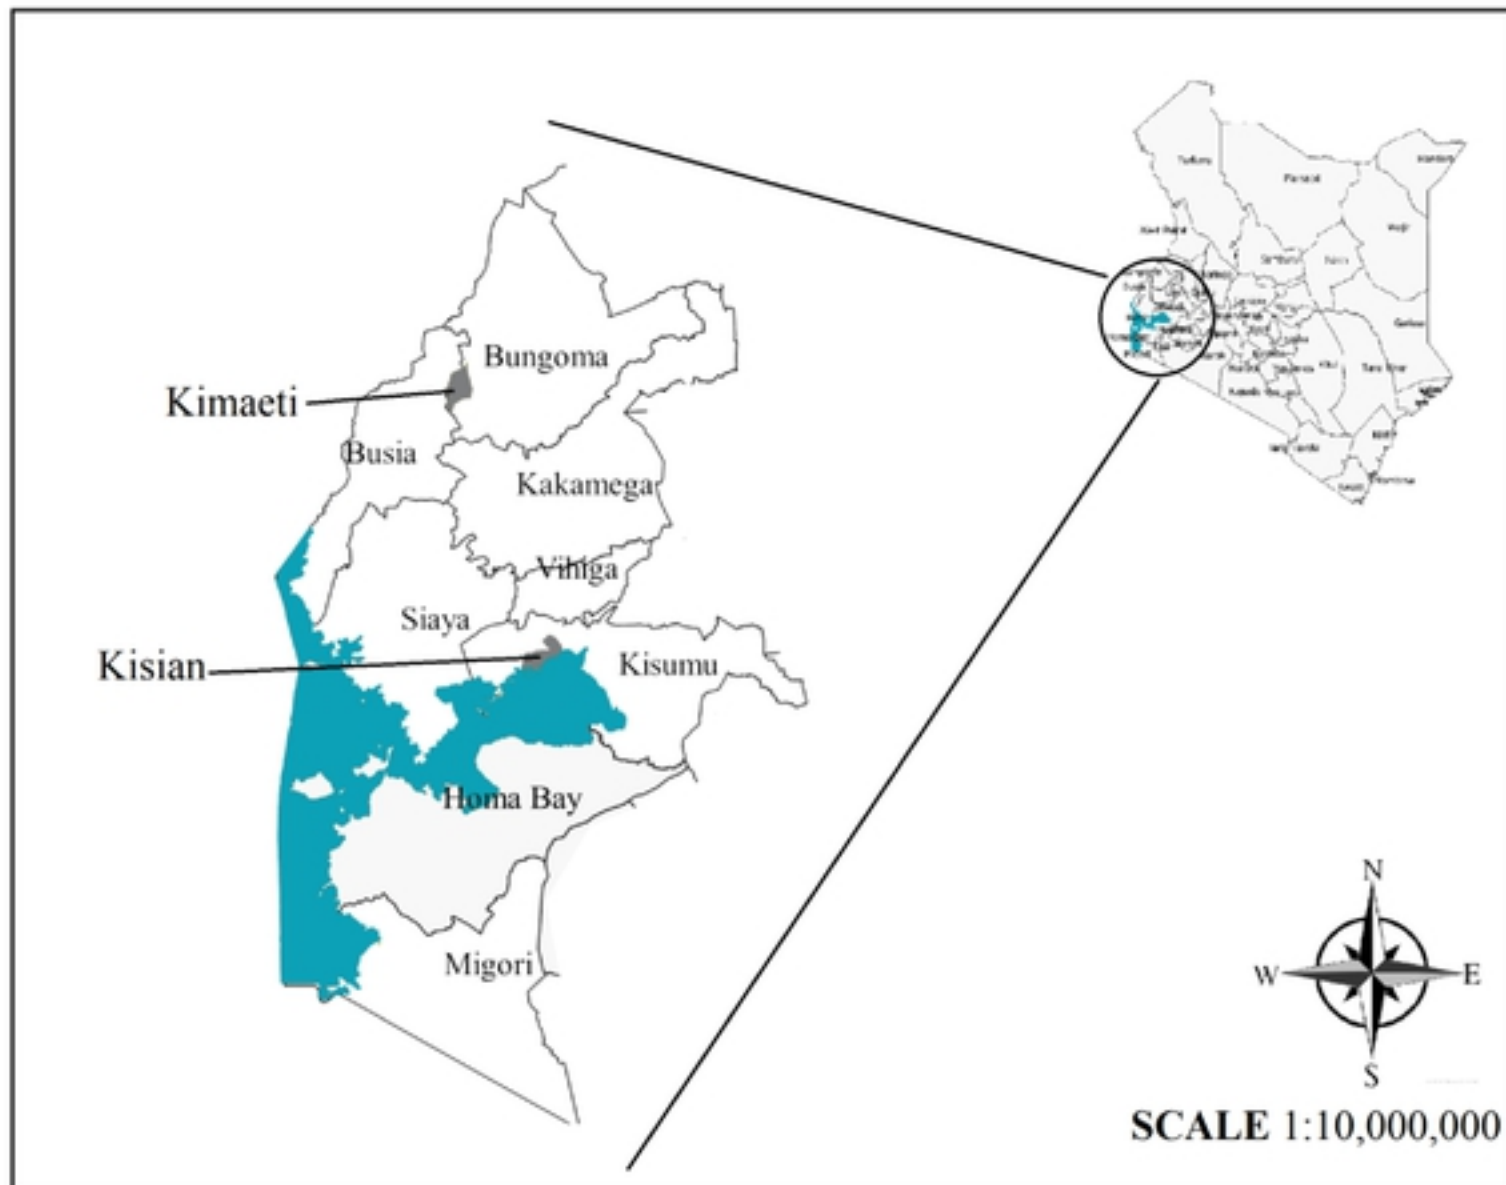

Figure 1

**A. *Anopheles gambiae s.l.***

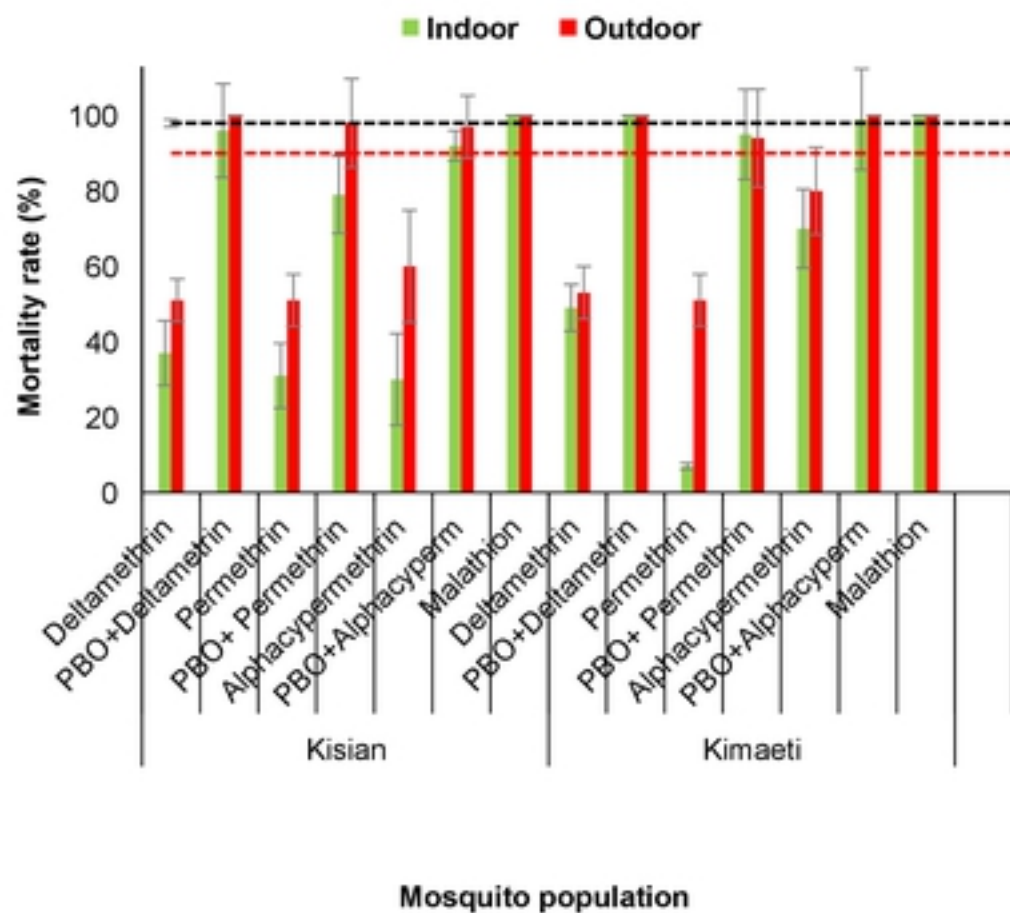

**B. *Anopheles funestus***

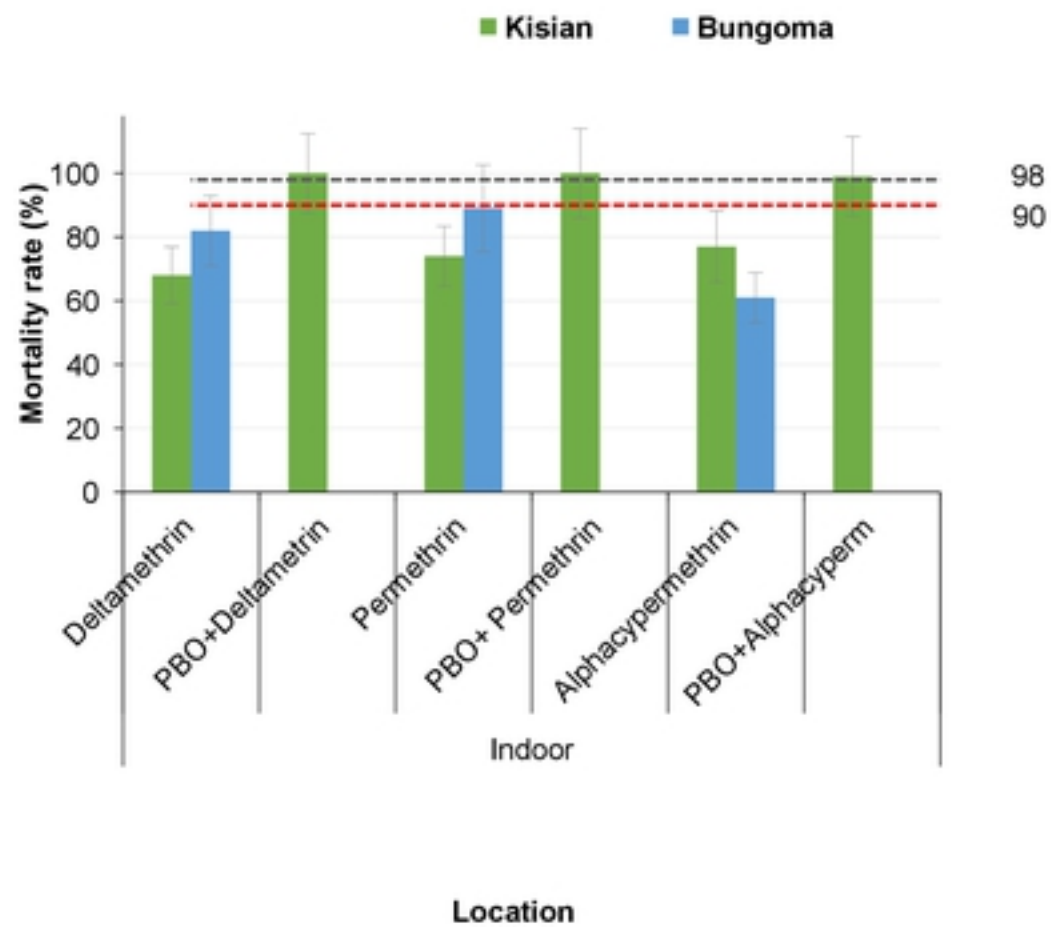

Figure 2

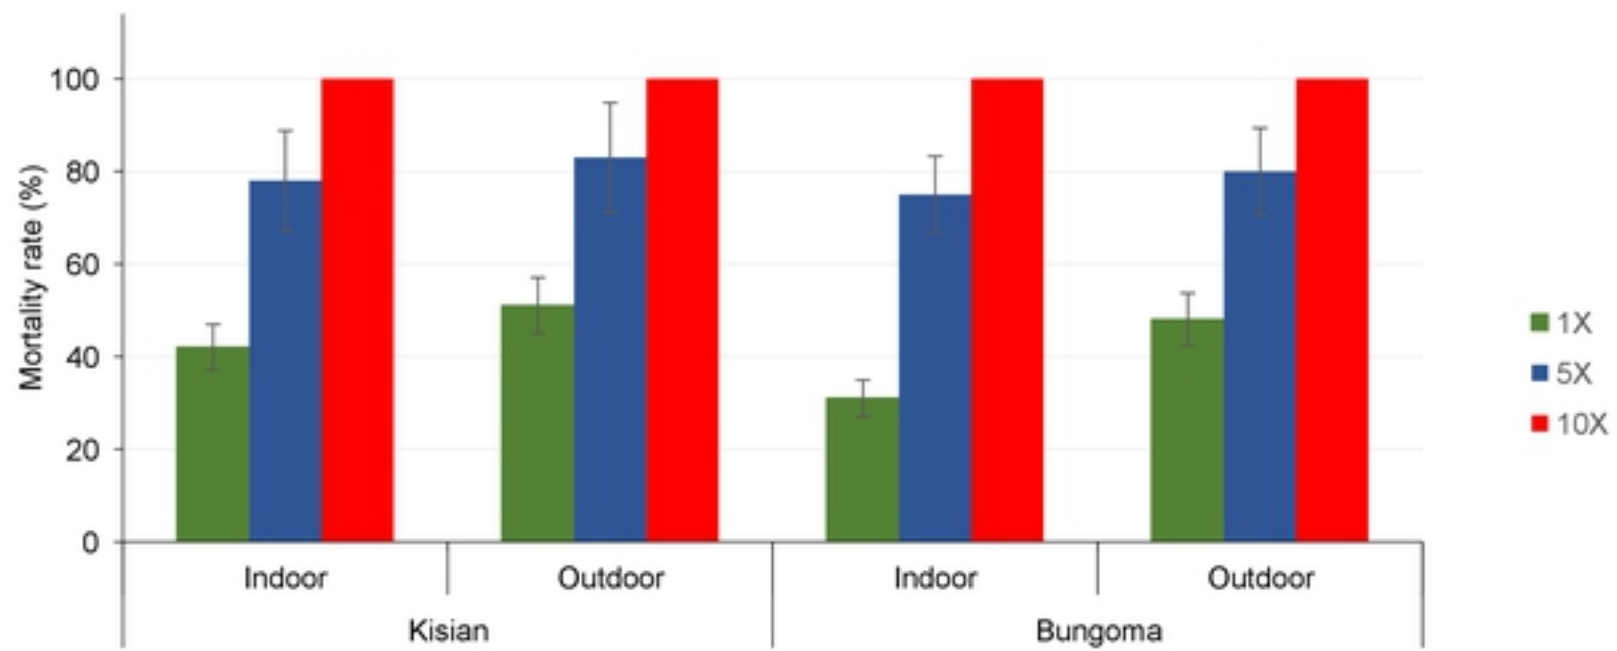

Figure 3



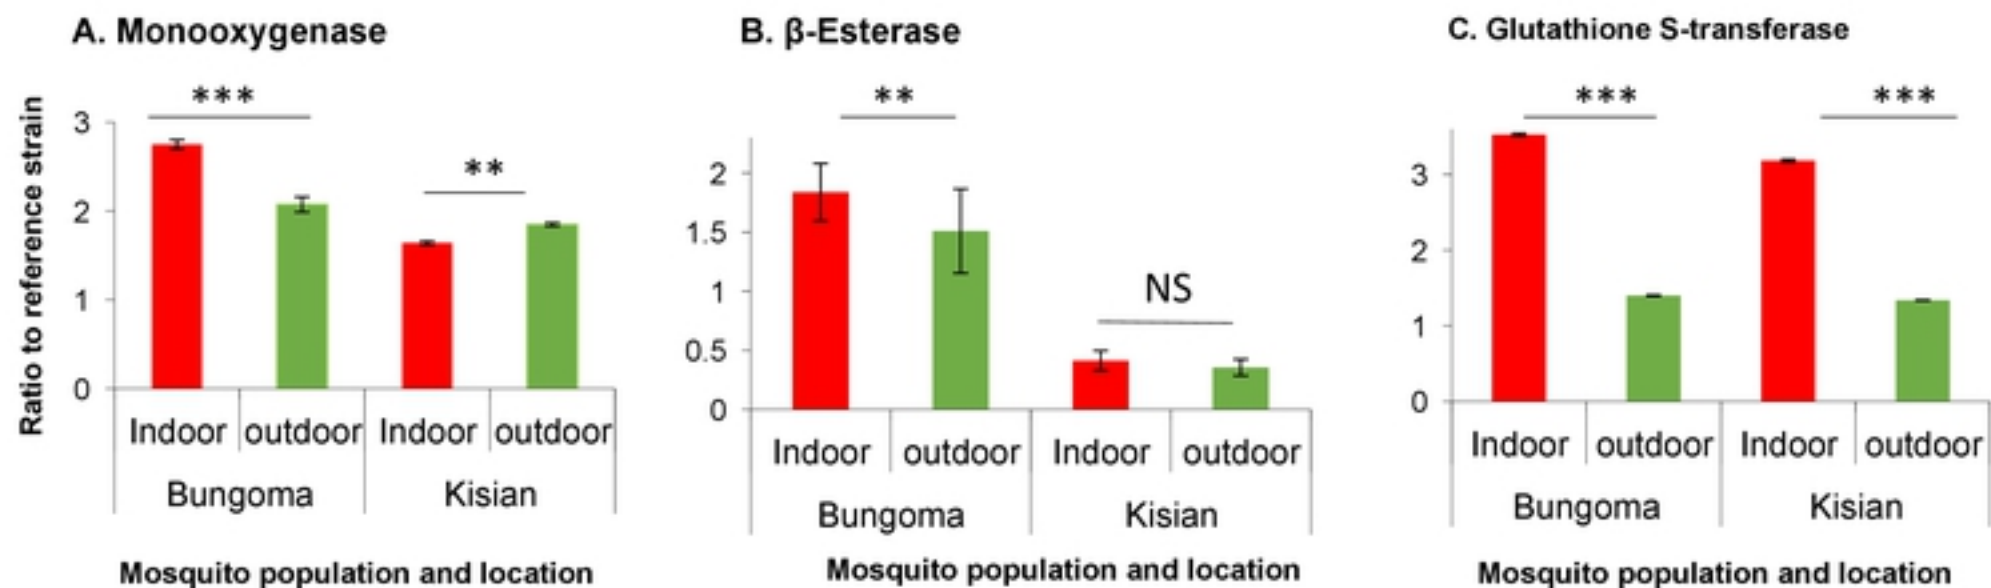

Figure 4
